# Supplementary material
Source: publisher figshare collection journal article supplement (https://sage.figshare.com/ndownloader/files/18080261)
Supplement: Supplementary file 1 [file 18080261]

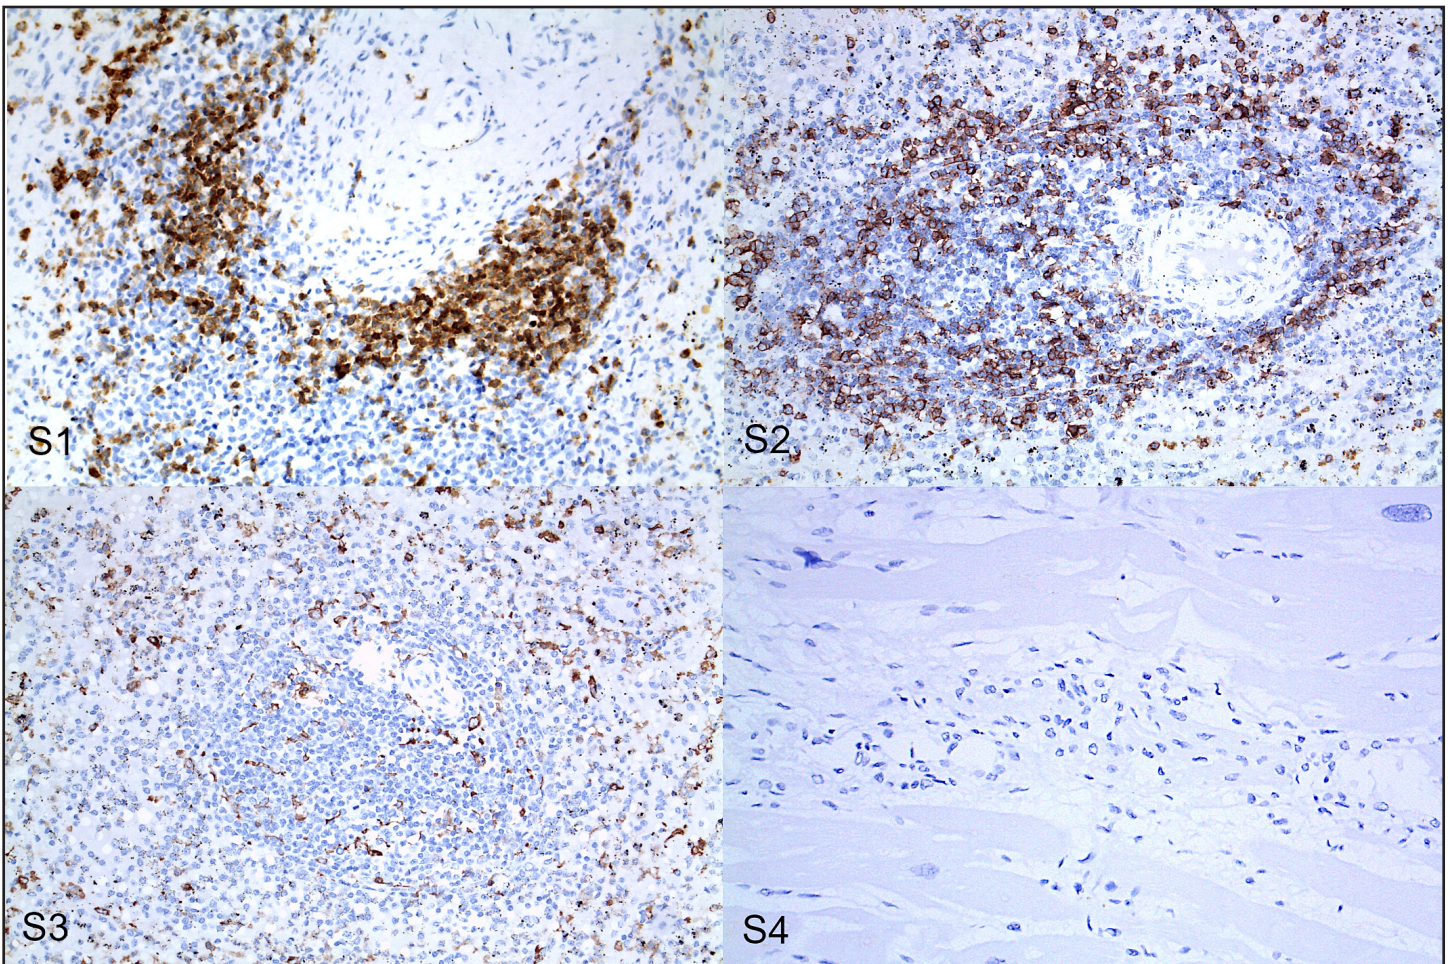

Supplemental Figure S1: Spleen, chimpanzee, case C25, positive control. Immunohistochemistry (IHC) for CD3.

Supplemental Figure S2: Spleen, chimpanzee, case C25, positive control. IHC for CD20.

Supplemental Figure S3: Spleen, chimpanzee, case C25, positive control. IHC for Iba1.

Supplemental Figure S4: Myocardium, chimpanzee, case C4, negative control. IHC for CD3.



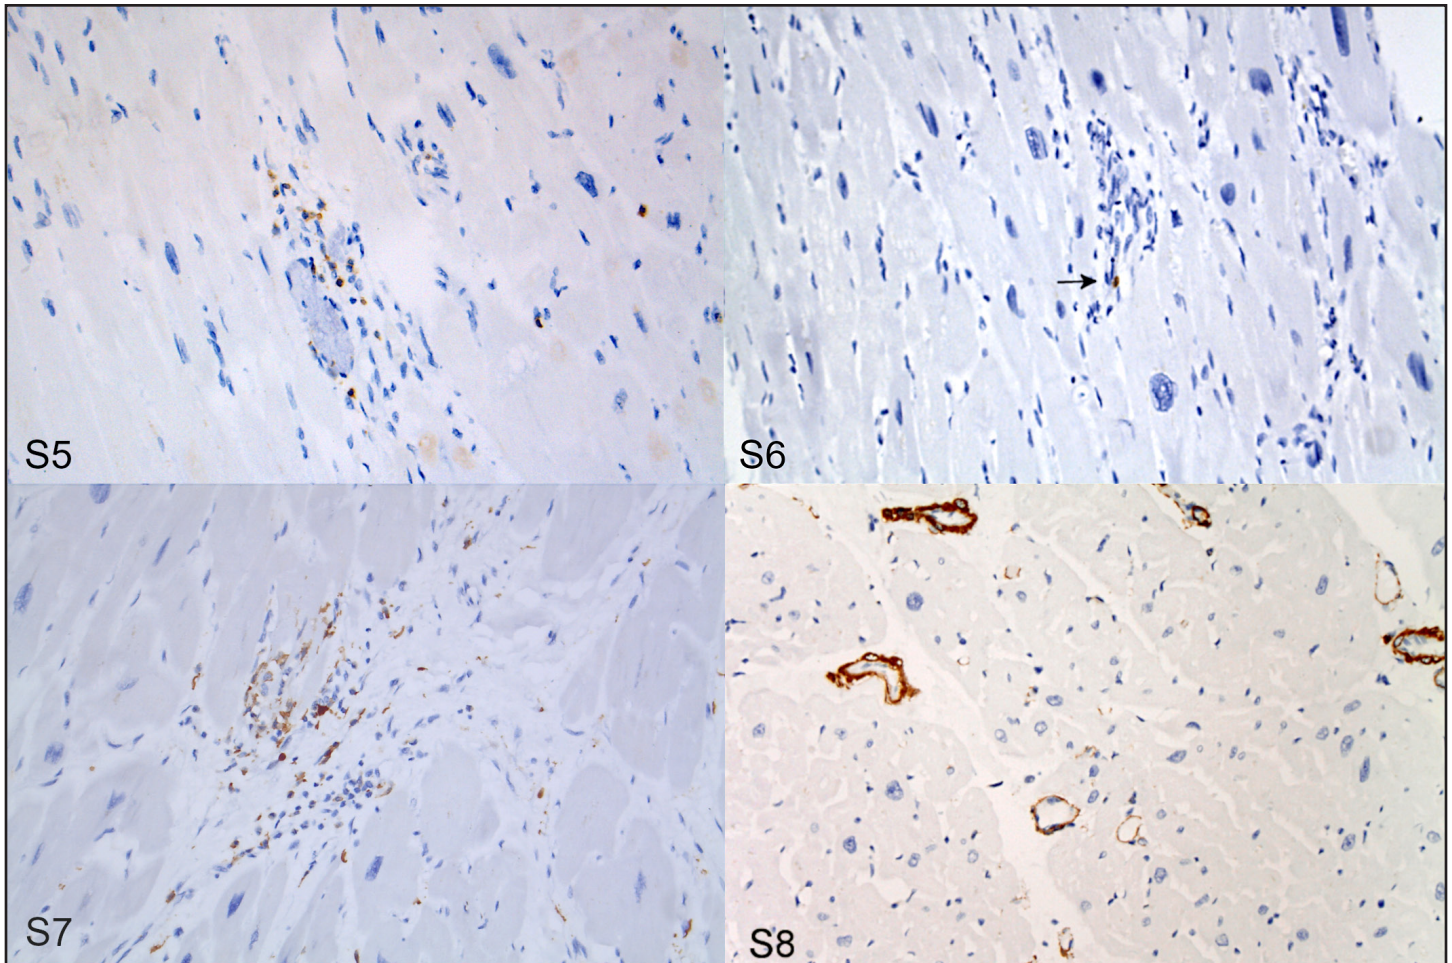

Supplemental Figure S5: Idiopathic Myocardial Fibrosis (IMF), heart, chimpanzee, case C10. There is a mild leukocytic perivascular infiltrate and multifocal immunolabeling. Immunohistochemistry (IHC) for CD3.

Supplemental Figure S6: IMF, heart, chimpanzee, case C10. There is a mild leukocytic perivascular infiltrate and scattered immunolabeling (arrow). IHC for CD20.

Supplemental Figure S7: IMF, heart, chimpanzee, case C10. There is a mild leukocytic perivascular infiltrate and prominent immunolabeling. IHC for IBA 1.

Supplemental Figure S8: Heart, chimpanzee C20. Normal tissue. Internal positive control of immunolabeled smooth muscle cells of the vascular tunica media and capillary pericytes. IHC for  $\alpha$ -SMA.

# Veterinary Pathology: Supplemental Materials.

## Strong et al. Idiopathic myocardial fibrosis in captive chimpanzees (Pan troglodytes).

Supplement S1: Demographic data, circumstances and cause of death (if identified), key histopathological features (+ for mild, ++ for moderate and +++ for marked changes) and final cardiovascular diagnoses for 35 (33 European-zoo and 2 African sanctuary) chimpanzees which underwent macroscopic and histopathologic examination according to the comprehensive protocol.

| Study ID   | BW (kg) | Sex | Age (yrs) | Circumstances +/- cause of death              | Histopathological features |            |          |           | Final cardiovascular diagnoses                                                 |
|------------|---------|-----|-----------|-----------------------------------------------|----------------------------|------------|----------|-----------|--------------------------------------------------------------------------------|
|            |         |     |           |                                               | Chronic RF                 | Chronic IF | Acute AM | Acute CBN |                                                                                |
| <b>C1</b>  | 58      | M   | 10        | Accidental death                              | + - ++                     | +          | +        | +         | Mild IMF<br>Acute, multifocal myocardial necrosis                              |
| <b>C2</b>  | 72      | M   | 37        | Perianesthetic death                          | +++                        | + - ++     | ++       | ++        | Mod LVH<br>Marked myocardial fibrosis<br>Acute, multifocal myocardial necrosis |
| <b>C3</b>  | 59      | M   | 33        | Perianesthetic death                          | ++ -<br>+++                | ++         | +        | +         | Moderate to marked IMF<br>Acute, multifocal myocardial necrosis                |
| <b>C4</b>  | 61      | M   | 33        | Sudden cardiac death                          | +++                        | +++        | +        | +++       | Marked IMF<br>Acute, multifocal myocardial necrosis                            |
| <b>C5</b>  | 69      | M   | 28        | Sudden death history of diabetes              | +++                        | ++ - +++   | +        | +         | Marked IMF<br>Acute multifocal myocardial necrosis                             |
| <b>C6</b>  | 45      | M   | 31        | Perianesthetic death ,<br>bronchopneumonia    | +                          | +          | -        | -         | Mild IMF                                                                       |
| <b>C7</b>  | 67      | M   | 22        | Sudden cardiac death                          | ++ -<br>+++                | ++         | +        | +++       | Moderate to marked IMF<br>Acute, multifocal myocardial necrosis                |
| <b>C8</b>  | 69      | M   | 39        | Accidental death                              | ++                         | +          | ++       | +++       | Moderate IMF<br>Acute, multifocal myocardial necrosis                          |
| <b>C9</b>  | 48      | F   | 32        | Accidental death                              | +                          | +          | ++       | +++       | Mild IMF<br>Acute, multifocal myocardial necrosis                              |
| <b>C10</b> | 40      | F   | 25        | Perianesthetic death,<br>pleuritis, pneumonia | ++                         | +++        | ++       | -         | Mod LVH<br>Marked myocardial fibrosis,<br>Acute, multifocal myocardial         |

Supplemental Table S2: Panel of human antibodies used for immunohistochemistry to characterize the scar-related minimal to mild leukocytic infiltrate and presence of myofibroblasts in idiopathic myocardial fibrosis in 10 (8 affected; 2 unaffected) chimpanzees.

| Antigen       | Antibody  | Type              | Dilution | Source               |
|---------------|-----------|-------------------|----------|----------------------|
| IBA-1         | AIF1/IBA1 | polyclonal goat   | 1:500    | Lifespan Biosciences |
| $\alpha$ -SMA | Ab5695    | polyclonal rabbit | 1:500    | Abcam                |
| CD3           | A0452     | polyclonal rabbit | 1:500    | Dako                 |
| CD20          | RB 9013-P | polyclonal rabbit | 1:500    | Thermo fisher        |

According to the commercial diagnostic lab, antigen retrieval was performed by calibrated water bath capable of maintaining the epitope retrieval solution in 10 mM sodium citrate buffer (pH 6.0) at 97°C for 30 min. Endogenous peroxidase was blocked using 100  $\mu$ L DakoREAL TM peroxidase blocking solution for 10 minutes (Dako, USA). Sections were then incubated with the primary antibody (Supplement 1) and evaluated by peroxidase conjugated polymer (EnVision plus Detection KIT; Dako) for 30 min and diaminobenzidine tetrahydrochloride was used as detection system (EnVisionTM FLEX DAB+ Chromogen (DM827), Dako).

# Veterinary Pathology: Supplemental Materials.

Strong et al. Idiopathic myocardial fibrosis in captive chimpanzees (*Pan troglodytes*).

Supplemental Table S3: Overview of virological tests in cardiac tissues showing none to marked IMF with a variable, fibrosis related, minimal to mild, mixed leukocytic infiltrate.

|                          |                                      | <b>C15</b>             | <b>C20</b> | <b>C8</b>      | <b>C9</b>     | <b>C4</b>      | <b>C11</b> |
|--------------------------|--------------------------------------|------------------------|------------|----------------|---------------|----------------|------------|
| <b>Cardiac Pathology</b> | Histological diagnosis:              | Moderate to marked IMF | None       | Moderate IMF   | Mild IMF      | Marked IMF     | Mild IMF   |
|                          | RF associated leukocytic infiltrate: | Mild ly/mc/neu         | -          | Mild ly/mc/neu | Minimal ly/mc | Mild ly/mc/eos | -          |
| <b>Viral PCR results</b> | Pan Herpes PCR                       | +                      | -          | -              | +             | -              | +          |
|                          | EMCV RNA PCR                         | -                      | -          | -              | -             | -              | -          |
|                          | Adenovirus DNA PCR                   | -                      | -          | -              | -             | -              | -          |
|                          | Parvovirus (VP2) DNA PCR             | -                      | -          | -              | -             | -              | -          |
|                          | Enterovirus RNA PCR                  | -                      | -          | -              | -             | -              | -          |
|                          | HHV6 DNA PCR                         | -                      | -          | -              | -             | -              | -          |
| <b>IHC</b>               | Human herpes simplex virus 1         | -                      | n/d        | n/d            | -             | n/d            | -          |
|                          | Human herpes simplex virus 2         | -                      | n/d        | n/d            | -             | n/d            | -          |
|                          | Cytomegalovirus                      | -                      | n/d        | n/d            | -             | n/d            | -          |

Abbreviations: IMF Idiopathic Myocardial Fibrosis; RF Replacement Fibrosis; ly lymphocytes; mc macrophages; neu neutrophils; eos eosinophils; PCR Polymerase chain reaction; IHC Immunohistochemistry; n/d no data.
